# Supplementary material for: Accelerated phosphatidylcholine turnover in macrophages promotes adipose tissue inflammation in obesity
Source: eLife. 2019 Aug 16;8:e47990. doi: 10.7554/eLife.47990 (PMC6748830; doi:10.7554/eLife.47990)
Supplement: Figure 6—source data 1. — Peak areas for each lipid were normalised to the peak areas of a respective internal standard and expressed as peak area ratios. [file elife-47990-fig6-data1.xlsx]

## Sheet: Sheet1
			LPC(16:1)	LPC(20:4)	LPC(18:1)	LPC(16:0)	LPC(18:0)	PS(36:1)	SM_38:5	PC_30:2	PC_32:3	PS(32:2)	PE_34:2	PS(32:1)	PS(34:2)	PS(36:0)	SM_34:4	PE_36:3	PC(32:2)	PC_34:4	SM_34:3	SM_38:4	PC_28:0	PC_38:7	PC_40:8	SM_32:0	SM_34:2	PC_30:1	PC_32:2	PE_32:0	PC_34:3	PE_34:1	PE_36:2	PE_36:5	PC_36:4	PC_38:6	PC_40:7	PE(32:2)	PS(34:1)	SM_34:1	SM_36:4	PE_38:3	PC_30:0	PC_32:1	PE(32:1)	SM_34:0	SM_36:3	PC_34:2	PC_38:5
Provided; sample name	Provided; other information	CRE	Area Ratio	Area Ratio	Area Ratio	Area Ratio	Area Ratio	Area Ratio	Area Ratio	Area Ratio	Area Ratio	Area Ratio	Area Ratio	Area Ratio	Area Ratio	Area Ratio	Area Ratio	Area Ratio	Area Ratio	Area Ratio	Area Ratio	Area Ratio	Area Ratio	Area Ratio	Area Ratio	Area Ratio	Area Ratio	Area Ratio	Area Ratio	Area Ratio	Area Ratio	Area Ratio	Area Ratio	Area Ratio	Area Ratio	Area Ratio	Area Ratio	Area Ratio	Area Ratio	Area Ratio	Area Ratio	Area Ratio	Area Ratio	Area Ratio	Area Ratio	Area Ratio	Area Ratio	Area Ratio	Area Ratio
BM1	Mouse ID_463_Treatment_BSA	+	0.00387581	0.00343248	0.0347611	0.207962	0.274794	NF	NF	0.00387298	0.0246828	NF	0.12274	0.00277543	0.0155483	NF	NF	0.0601719	1.06174	0.122517	NF	0.00677576	0.15333	0.0965841	0.0983539	0.00918434	0.329172	0.408424	1.04013	1.67588	0.813705	5.56048	3.69191	0.0362478	10.0521	4.81178	2.25539	NF	0.381976	61.4362	NF	2.51602	2.7511	15.0257	0.29557	2.12922	0.0101116	8.99751	8.42018
BM2	Mouse ID_464_Treatment_BSA	-	0.00385694	0.00198788	0.0452094	0.204877	0.256535	NF	NF	0.00494333	0.0267648	NF	0.11146	0.00503376	0.0228746	NF	NF	0.0725661	1.22924	0.107396	NF	0.00565238	0.178297	0.113843	0.0963935	0.00473535	0.287494	0.511344	1.20834	1.64725	0.95709	5.74183	3.9553	0.129378	8.06272	4.80992	2.45563	NF	0.441367	52.8813	0.00200058	2.38299	3.14944	17.1722	0.367665	1.63266	0.0251293	10.0673	6.73408
BM3	Mouse ID_465_Treatment_BSA	-	0.00773935	0.00593952	0.072454	0.354075	0.473042	NF	NF	0.00836481	0.0499285	NF	0.179739	0.00525689	0.0423955	NF	NF	0.0681227	2.1604	0.216311	NF	0.0143107	0.27143	0.20019	0.21567	0.00280469	0.535424	0.906021	2.13154	2.1834	1.58364	7.51621	4.90881	0.125814	14.6421	7.31858	3.58077	0.00105008	0.91856	85.1388	0.00154628	3.69334	4.64738	27.9539	0.523771	3.24466	0.0296013	16.6207	12.3284
BM4	Mouse ID_466_Treatment_BSA	+	0.00625854	0.00613438	0.0541707	0.309014	0.450012	NF	NF	0.0058992	0.0483255	NF	0.193472	0.00415611	0.0287269	NF	NF	0.0413313	1.81008	0.192224	NF	0.0105447	0.193443	0.161259	0.19367	0.0117749	0.553272	0.670928	1.78937	2.14877	1.31767	7.17383	4.55751	0.147709	14.8701	6.76932	3.13136	NF	0.71992	83.9533	0.00213259	3.60575	3.73583	21.9353	0.478997	3.13345	0.0127099	13.0275	12.3138
BM5	Mouse ID_467_Treatment_BSA	-	0.006296	0.00445486	0.073874	0.358749	0.485228	NF	NF	0.00819289	0.0495655	NF	0.231161	0.00809994	0.0474549	NF	NF	0.0857815	2.18596	0.203536	NF	0.0149262	0.302851	0.200769	0.194514	0.00520588	0.624263	0.957436	2.15764	3.21438	1.55469	10.3143	6.70336	0.178755	12.8931	6.9588	3.53427	0.00243102	0.772214	87.1972	NF	4.5135	4.53904	27.6817	0.703545	3.08604	0.0479512	16.5009	10.9824
BM6	Mouse ID_468_Treatment_BSA	+	0.00636369	0.00700761	0.0569231	0.314482	0.467391	NF	NF	0.0066563	0.0396979	NF	0.215483	0.00529971	0.0360441	NF	NF	0.0472217	1.76678	0.199442	NF	0.0230037	0.228364	0.164634	0.17959	0.00977338	0.588575	0.738571	1.74922	2.66986	1.30305	8.96233	5.7856	0.170951	14.1338	6.71082	3.27668	0.00226653	0.812784	90.5143	NF	4.09732	3.91296	23.6119	0.725431	3.47593	0.0188637	13.876	11.8317
BM7	Mouse ID_472_Treatment_BSA	-	0.00575162	0.00397838	0.0540589	0.33455	0.390543	NF	NF	0.00703881	0.0516805	NF	0.258095	0.0117963	0.0499211	NF	NF	0.126903	2.02945	0.186493	NF	0.0120655	0.276954	0.194958	0.182489	0.00196245	0.570149	0.897593	1.99844	3.41447	1.41583	10.831	7.68637	0.123918	11.914	6.5591	3.42357	0.00238376	0.837205	84.5958	0.00167477	4.58917	4.28651	26.4526	0.840419	2.98984	0.0147357	15.6046	10.2573
BM8	Mouse ID_473_Treatment_BSA	+	0.00484739	0.00351893	0.040735	0.284405	0.327994	NF	NF	0.00609037	0.041821	NF	0.177151	0.00454157	0.0177634	NF	NF	0.0608041	1.52582	0.14583	NF	0.0112986	0.213805	0.134018	0.115399	0.00996735	0.502966	0.602332	1.50871	2.08231	1.07161	6.78812	4.38822	0.0529271	11.0388	5.98474	2.91204	NF	0.56426	75.9851	0.000751874	2.77414	3.59715	19.205	0.450909	2.54023	0.0107931	11.1123	9.47741
BM9	Mouse ID_475_Treatment_BSA	+	0.00759476	0.00629153	0.0796884	0.379308	0.499789	NF	NF	0.00644815	0.0415165	NF	0.223845	0.00676376	0.0344236	NF	NF	0.0690691	1.87008	0.184094	NF	0.0132758	0.21687	0.173598	0.186715	0.0115981	0.573421	0.790964	1.85067	2.488	1.34143	8.92561	6.25772	0.215375	12.2565	5.89861	2.95452	0.00258877	0.800218	87.2959	0.00490505	4.24689	3.57401	23.6337	0.681745	3.1999	0.0140984	13.9301	10.5742
BM10	Mouse ID_476_Treatment_BSA	+	0.00802063	0.0106592	0.0837772	0.381036	0.520269	NF	NF	0.00548481	0.0382613	NF	0.222978	0.00364642	0.0296514	NF	NF	0.0223644	1.77794	0.207673	NF	NF	0.192752	0.174787	0.212669	0.0145596	0.519651	0.687529	1.76052	2.5146	1.34248	9.20221	6.20798	0.234403	14.4413	6.64391	3.0368	0.0011522	0.720978	85.1203	0.00154444	4.48424	3.57665	21.6546	0.640234	3.12806	0.0144548	12.5035	11.9628
BM11	Mouse ID_477_Treatment_BSA	+	0.00815226	0.00585037	0.0675153	0.359468	0.506155	NF	NF	0.00772705	0.0516006	NF	0.297859	0.00752372	0.0406498	NF	NF	0.148635	2.32347	0.221132	NF	0.0285829	0.272057	0.208824	0.23389	0.0155235	0.668226	0.926166	2.29805	3.69432	1.63742	12.3519	8.24271	0.338453	15.3505	7.37178	3.67471	0.0014029	0.865244	98.4168	0.00636757	5.76573	4.30958	28.7105	1.03528	3.73325	0.00707487	17.0794	13.1438
BM12	Mouse ID_479_Treatment_BSA	-	0.00573862	0.00297734	0.0458292	0.303472	0.373021	NF	NF	0.00796266	0.0425904	NF	0.215799	0.00598028	0.0434155	NF	NF	0.0965464	1.77914	0.173076	NF	0.0120511	0.270343	0.178395	0.158931	0.0143501	0.556991	0.820038	1.75933	2.78717	1.30412	8.70025	5.95818	0.168627	11.5685	6.65057	3.35539	0.00407054	0.799565	82.89	0.00792032	3.7189	4.24425	24.1213	0.641976	2.9142	0.0254514	14.6679	10.0489
BM13	Mouse ID_480_Treatment_BSA	-	0.00519788	0.00328133	0.045744	0.299421	0.355448	NF	NF	0.00719993	0.0458753	NF	0.245529	0.00567349	0.024453	NF	NF	0.115079	1.74961	0.166961	NF	NF	0.239599	0.168628	0.157023	0.0111499	0.505653	0.748022	1.72507	3.01581	1.29516	9.94826	6.86506	0.220752	11.4186	6.60857	3.33808	0.00104697	0.758844	78.4935	0.0303781	4.28454	4.18731	23.3925	0.645613	2.75505	0.0327905	13.8131	9.63805
BM14	Mouse ID_481_Treatment_BSA	+	0.00603694	0.00581509	0.0421648	0.32411	0.410166	NF	NF	0.00609125	0.0387849	NF	0.247116	0.00914537	0.03704	NF	NF	0.082317	1.68577	0.175662	NF	0.0315204	0.21108	0.158977	0.172962	0.0187697	0.583759	0.724555	1.66923	2.95047	1.21135	9.91286	6.74747	0.24656	11.5967	5.74247	2.78124	0.0035606	0.746962	85.4875	0.0022363	4.38972	3.39045	21.2856	0.746885	3.62816	0.00734734	12.6534	10.1048
BM15	Mouse ID_482_Treatment_BSA	-	0.00756256	0.00572312	0.0496511	0.378763	0.44456	NF	NF	0.00700563	0.0472696	NF	0.249293	0.00774199	0.0472643	NF	NF	0.103512	2.06681	0.192552	NF	0.0110546	0.260904	0.199387	0.197958	0.0104223	0.573424	0.881689	2.03429	3.26568	1.48808	10.9433	7.55515	0.214028	12.7547	6.8706	3.48047	0.00139128	0.830797	88.8401	0.0221366	4.96672	4.28809	26.2789	0.795776	3.21763	0.0179292	15.4234	11.1928
BM16	Mouse ID_463_Treatment_palmitic acid	+	0.00482285	0.00550992	0.029294	1.80634	0.77394	NF	NF	NF	0.00258886	NF	NF	0.00479258	0.00515038	0.00128879	NF	0.0103069	0.138625	0.0386444	NF	0.00757647	0.0371067	0.0139422	0.0110371	0.00246062	0.104692	0.050545	0.136324	0.371809	0.224469	0.825834	0.332222	0.242866	10.6806	4.83724	0.288788	0.00139428	0.139336	21.2035	NF	1.61021	1.58413	7.82195	0.186637	0.575345	0.00461813	3.15933	3.80622
BM17	Mouse ID_464_Treatment_palmitic acid	-	0.00209693	0.00060556	0.00904098	1.03813	0.41315	NF	NF	NF	0.000690429	NF	NF	0.000439675	0.000238394	0.00114817	NF	0.00066567	0.0582389	0.0147773	NF	0.00290938	0.0186005	0.00356512	0.00120617	0.000819237	0.0504461	0.0241898	0.0577793	0.298516	0.101849	0.388276	0.244341	0.0474247	4.34773	1.96051	0.110681	NF	0.0494609	8.99645	NF	0.974082	0.193867	3.46745	0.012277	0.240702	NF	1.36533	1.53674
BM18	Mouse ID_465_Treatment_palmitic acid	-	0.00610972	0.00319155	0.022037	1.84651	0.785094	NF	NF	NF	0.00300784	NF	NF	0.00418942	0.00321362	0.000899148	NF	0.0105941	0.192599	0.0337589	NF	0.00556604	0.0400965	0.0240295	0.00521878	0.000942574	0.0764733	0.070089	0.190474	0.416082	0.319853	1.09451	0.510901	0.430019	8.85796	4.59656	0.288466	0.0105094	0.140994	19.1387	NF	2.10641	1.7405	10.4806	0.373435	0.433052	0.00760465	3.68196	3.03451
BM19	Mouse ID_466_Treatment_palmitic acid	+	0.0111083	0.00973299	0.0474963	2.0711	0.952558	NF	NF	4.46538e-05	0.00399166	NF	0.00151819	0.0104329	0.00271255	0.00227067	NF	0.0234193	0.266425	0.0588543	NF	0.00514131	0.0427745	0.0356163	0.0186148	0.00317271	0.154187	0.088896	0.265009	0.383524	0.435147	1.30735	0.493042	0.718226	15.2861	6.88857	0.470379	0.0137374	0.261308	30.5667	NF	3.09854	1.79498	13.804	0.659868	0.792334	0.0102766	5.12585	5.24731
BM20	Mouse ID_467_Treatment_palmitic acid	-	0.00223785	0.000221123	0.00878643	0.906786	0.365257	NF	NF	NF	0.00059921	NF	NF	0.000886055	0.000182728	0.000343977	NF	0.000788872	0.0620211	0.0152621	NF	0.00153421	0.0187761	0.00759363	0.00139527	NF	0.0510137	0.0284682	0.0608425	0.308773	0.101332	0.475001	0.21457	0.0514872	3.95123	1.75071	0.1039	0.00184225	0.0438698	8.05355	NF	1.06693	0.279807	3.86136	0.0055405	0.255998	0.000468871	1.39073	1.39352
BM21	Mouse ID_468_Treatment_palmitic acid	+	0.00573082	0.00593981	0.0185977	1.3538	0.563102	NF	NF	NF	0.00188721	NF	0.000650108	0.00350146	0.00247692	0.00114386	NF	0.00813276	0.114877	0.0284924	NF	0.00458863	0.0283541	0.0133585	0.00788282	0.00139996	0.0787987	0.0456293	0.113743	0.332141	0.189958	0.673627	0.385378	0.207519	7.06345	3.22823	0.204636	0.00366497	0.0828499	15.0958	NF	1.34942	0.740322	6.24156	0.0803026	0.36004	0.00619436	2.30254	2.62097
BM22	Mouse ID_472_Treatment_palmitic acid	-	0.00231835	0.00113644	0.00898266	0.989534	0.394242	NF	NF	NF	0.00109855	NF	NF	0.00103382	0.000227108	0.000366384	NF	0.00145257	0.0768075	0.0162019	NF	0.00536451	0.0213969	0.00701119	0.000812507	0.000358773	0.047525	0.0310524	0.0755303	0.362247	0.125293	0.551694	0.323773	0.065232	4.60182	2.18534	0.124001	0.00175803	0.0439743	8.77991	NF	1.14149	0.152697	4.54891	0.00474573	0.230176	0.00159103	1.52008	1.66072
BM23	Mouse ID_473_Treatment_palmitic acid	+	0.00561958	0.00680277	0.0178147	1.78902	0.715344	NF	NF	NF	0.00199836	NF	NF	0.00384886	0.000797005	0.000401425	NF	0.00797604	0.133434	0.0312647	NF	0.00763237	0.0303319	0.021267	0.0108625	0.00203898	0.0949001	0.0466071	0.131952	0.354884	0.195736	0.726955	0.332861	0.216487	9.12378	4.12663	0.231207	0.00410789	0.0970132	16.7531	NF	1.41732	0.57583	7.7413	0.205887	0.399901	0.00139159	2.4723	3.36102
BM24	Mouse ID_475_Treatment_palmitic acid	+	0.00434291	0.00257412	0.0158573	1.18466	0.547953	NF	NF	NF	0.00146599	NF	0.000912654	0.00390015	0.00342596	0.00158183	NF	0.0025486	0.137728	0.0268676	NF	0.00153539	0.0292778	0.0170075	0.00329596	0.000781252	0.0785295	0.0563359	0.136302	0.39358	0.234231	0.920488	0.552759	0.300496	6.8365	3.23694	0.219281	0.00558263	0.0955512	15.6063	NF	1.79422	0.328101	7.57621	0.205721	0.397032	NF	2.76033	2.58595
BM25	Mouse ID_476_Treatment_palmitic acid	+	0.00873733	0.00803281	0.0405062	1.89514	0.831553	NF	NF	0.00013973	0.00508251	NF	0.00236413	0.00824737	0.00816634	0.00274165	NF	0.00893983	0.26391	0.0526222	NF	0.00488724	0.0510937	0.0384292	0.024152	0.00307794	0.126579	0.0954968	0.260963	0.478387	0.427726	1.30662	0.793726	0.652339	12.8013	6.09013	0.433305	0.00880752	0.189836	26.139	NF	2.54516	0.733651	13.6069	0.571342	0.702508	0.0174118	5.16319	4.89517
BM26	Mouse ID_477_Treatment_palmitic acid	+	0.00666383	0.0068289	0.0269441	1.71713	0.767355	NF	NF	7.78403e-05	0.00279778	NF	NF	0.00781213	0.0069135	0.00209263	NF	0.0138195	0.184952	0.0383667	NF	0.00242858	0.0364689	0.0281018	0.0166805	0.00190821	0.105944	0.0674371	0.182873	0.360215	0.313562	0.97554	0.589075	0.548761	9.71699	4.53847	0.309949	0.00883528	0.151138	21.4371	NF	2.15227	0.560522	10.1058	0.445685	0.575854	0.0111481	3.66301	3.68356
BM27	Mouse ID_479_Treatment_palmitic acid	-	0.00119972	0.000984009	0.00652276	0.834958	0.304963	NF	NF	NF	0.000294892	NF	NF	0.000319428	0.00018221	0.000271544	NF	NF	0.0470343	0.0135761	NF	0.000485944	0.0155203	0.00616886	0.00120825	NF	0.0460455	0.0201588	0.0466818	0.249064	0.0814946	0.325675	0.195486	0.0103997	3.7856	1.62027	0.0871354	NF	0.0299075	7.22491	NF	0.900585	NF	2.80358	0.00639078	0.205903	NF	1.07603	1.31516
BM28	Mouse ID_480_Treatment_palmitic acid	-	0.00189176	0.00213979	0.0125398	1.16582	0.461591	NF	NF	NF	0.0010551	NF	NF	0.00147486	0.000707398	0.000503829	NF	0.0033914	0.0790439	0.0203769	NF	0.00140148	0.0170495	0.0120975	0.00911025	0.00203246	0.056667	0.0291443	0.0775466	0.268925	0.143101	0.487882	0.31549	0.178034	6.08171	2.72771	0.164182	0.000772073	0.0735982	11.1083	NF	1.24432	NF	4.6277	0.0517176	0.32527	0.00114938	1.79753	2.20027
BM29	Mouse ID_481_Treatment_palmitic acid	+	0.00565465	0.00446568	0.0226613	1.38218	0.60524	NF	NF	NF	0.00193327	NF	0.00155563	0.00429772	0.00312103	0.00178689	NF	0.0111599	0.133958	0.0327366	NF	0.00571987	0.0296375	0.0157616	0.0061745	0.00254348	0.0920477	0.0528209	0.132718	0.36759	0.219155	0.830449	0.506608	0.253608	8.4009	3.80676	0.24349	0.00473086	0.110171	16.8516	NF	1.69541	NF	7.5594	0.124034	0.483298	0.00354634	2.82093	3.09317
BM30	Mouse ID_482_Treatment_palmitic acid	-	0.00386154	0.00248308	0.0150068	1.06907	0.42588	NF	NF	NF	0.00093024	0.000225683	0.000884707	0.00195644	0.00043283	0.000422695	NF	NF	0.104818	0.0207683	NF	0.00906507	0.0229331	0.0134398	0.00446042	0.00136375	0.0603195	0.0404513	0.103645	0.322199	0.171852	0.706934	0.471444	0.143086	5.50625	2.64997	0.175493	0.00339245	0.0736461	12.1335	NF	1.49578	NF	5.86999	0.00711916	0.324384	NF	2.19102	2.10186
[truncated: 87 more columns]
